# Supplementary material for: TFEB is a master regulator of tumor-associated macrophages in breast cancer
Source: PubMed Central journal article supplement — J Immunother Cancer. 2020 Jun 2;8(1):e000543. doi: 10.1136/jitc-2020-000543 (PMC7269543; doi:10.1136/jitc-2020-000543), 2020-06-02
Supplement: jitc-2020-000543supp001.pdf [file jitc-2020-000543supp001.pdf]

**Supplementary Table S1. The sequences of primers used in the study**

| <b>Gene</b>    | <b>Forward primer (5'→3')</b> | <b>Reverse primer (5'→3')</b> |
|----------------|-------------------------------|-------------------------------|
| TFEB           | GCGGCAGAAGAAAGACAATC          | CTGCATCCTCCGGATGTAAT          |
| PPAR $\gamma$  | TTTTCAAGGGTGCCAGTTTC          | AATCCTTGGCCCTCTGAGAT          |
| Arg1           | TTTTTCCAGCAGACCAGCTT          | GGAACCCAGAGAGAGCATGA          |
| IL-10          | GGACAACATACTGCTAACCGAC        | TGGATCATTTCCGATAAGGCTTG       |
| COX2           | CAGCCAGGCAGCAAATCCTT          | AGTCCGGGTACAGTCACACT          |
| MMP9           | CATTCGCGTGGATAAGGAGT          | ACCTGGTTCACCTCATGGTC          |
| LC3            | CGTCCTGGACAAGACCAAGT          | ATTGCTGTCCCGAATGTCTC          |
| Lamp1          | ACATCAGCCCAAATGACACA          | GGCTAGAGCTGGCATTTCATC         |
| p62            | GATAGCCTTGGAGTCGGTGG          | CCGGGGATCAGCCTCTGTAG          |
| ATG5           | ACCCCTGAAATGAGTTTTCCAGA       | CATCCAGAGCTGCTTGTGGT          |
| NLRP3          | CAAGGCTGCTATCTGGAGGAA         | TGCAACGGACACTCGTCATC          |
| IL-1 $\beta$   | GCCCATCCTCTGTGACTCAT          | AGGCCACAGGTATTTTGTCTG         |
| IL-6           | AGTTGCCTTCTTGGGACTGA          | TCCACGATTTCCCAGAGAAC          |
| HIF-1 $\alpha$ | TCAAGTCACTCAACGTGGAAG         | TATCGAGGCTGTGTCTGACTG         |
| MIF            | GTGCCAGAGGGGTTTCTGT           | AGGCCACACAGCAGCTTACT          |
| cPLA2          | GCTTAAGGCAGGAGCTAACCT         | TGGCACGTAGAACCACAACA          |
| 18s            | CGCGGTTCTATTTTGTTGGT          | AGTCGGCATCGTTTATGGTC          |

**Supplementary Figure Legends**

**Supplementary Figure S1.** Flow cytometry analysis for T cells and dendritic cells (DCs) in the cells isolated from the resected orthotopic breast tumors in C57Bl/6 mice transplanted with bone marrow cells from TFEB<sup>fl/fl</sup> (BM-WT) or MΦ-TFEB<sup>-/-</sup> (BM-TFEB<sup>-/-</sup>) mice. Data are shown as Mean±SEM, n=3, \*p<0.05, two-tailed Student *t*-test.

**Supplementary Figure S2.** A. Heatmap of microarray data showing differentially expressed genes between WT and TFEBtg BMDMs treated with EO771 cell conditioned medium (ECM). Biologically triplicate samples were depicted in columns. B. Most significantly affected pathways by TFEB overexpression determined by Ingenuity pathway analysis. The stacked bar chart represents the percentage (%) of genes that were upregulated (red), no change (gray), or downregulated (green), and genes not overlapped with dataset (white) in each canonical pathway. The numerical value at the top of each bar represents the total number of genes in the considered pathway. The secondary y-axis (down) shows the -log of P-value calculated by right-tailed Fisher's exact test, which indicates the significance of each pathway. The ratio (orange dots connected by a line) indicates the ratio of genes from the dataset that map to the pathway divided by the total number of genes that map to the same pathway.

**Supplementary Figure S3.** Quantification of the relative protein levels in Figure 3B. The intensities of the indicated protein bands were normalized to the corresponding β-actin bands. The intensity of phosphorylated p65 was normalized relative to corresponding total p65. Data are shown as mean±SEM of triplicates and are

representative of three independent experiments. N=3; two-tailed Student *t*-test; \**p*<0.05, \*\**p*<0.01, \*\*\**p*<0.001.

**Supplementary Figure S4.** Quantification of the relative protein levels in Figure 4A.

The intensities of the indicated protein bands were normalized to corresponding  $\beta$ -actin bands. The intensity of phosphorylated p65 was normalized relative to corresponding total p65. Data are shown as mean $\pm$ SEM of triplicates and are representative of three independent experiments. N=3; two-tailed Student *t*-test; \**p*<0.05, \*\**p*<0.01, \*\*\**p*<0.001.

**Supplementary Figure S5.** A and B. Western blot analysis of TFEB protein levels in cytosolic or nuclear subcellular fraction and whole cells of pM $\Phi$ s treated with Trehalose (1 mM), HP $\beta$ CD (1 mM), CQ (10  $\mu$ M) and ECM. Histone H3 and GAPDH represent control proteins for the nuclear and cytosolic fraction, respectively. Quantification of relative intensity of the protein bands is shown under the lanes. C. Band intensities of proteins in Figure 5B were quantified by Gel-Pro Analyzer software and normalized by  $\beta$ -actin protein, and the intensity of phosphorylated p65 was normalized relative to total p65. D. Bone marrow-derived M $\Phi$ s from WT or M $\Phi$ s-specific Atg5 KO mice were treated with DMEM or trehalose for 12 h and the expression of ATG5 and PPAR $\gamma$  was measured by qPCR. Data are shown as mean $\pm$ SEM of triplicates and are representative of three independent experiments. N=3; two-tailed Student *t*-test; \**p*<0.05, \*\**p*<0.01, \*\*\**p*<0.001.

**Supplementary Figure S6.** A. qPCR measurement of Arg1 and IFN $\gamma$  expression in the tumors of mice treated with vehicle or trehalose. N=5. B. Tumor number and weight per mouse as well as the ratio of tumor weight to body weight were measured in the C3(1)/SV40Tag spontaneous breast tumor mouse treated with Trehalose (2 g/kg, three times a week) or vehicle from 6 weeks of age to 17 weeks of age.

**Supplementary Figure S7. TFEB expression is reduced in tumor-associated M $\Phi$ s in human breast cancer.** Formalin fixed paraffin embedded human breast cancer tumor and peri-tumor tissues were immunofluorescent stained for M $\Phi$ s (CD68) and TFEB; nuclei were counterstained using DAPI. Five pairs of tissues were used for quantification of TFEB positive M $\Phi$ s (Graph at lower panel). Four representative M $\Phi$ s were enlarged (Lower panel; 1 and 2: peritumor tissue cells; 3 and 4: tumor cells). Each data point represents the mean  $\pm$  SEM. \*p<0.05.

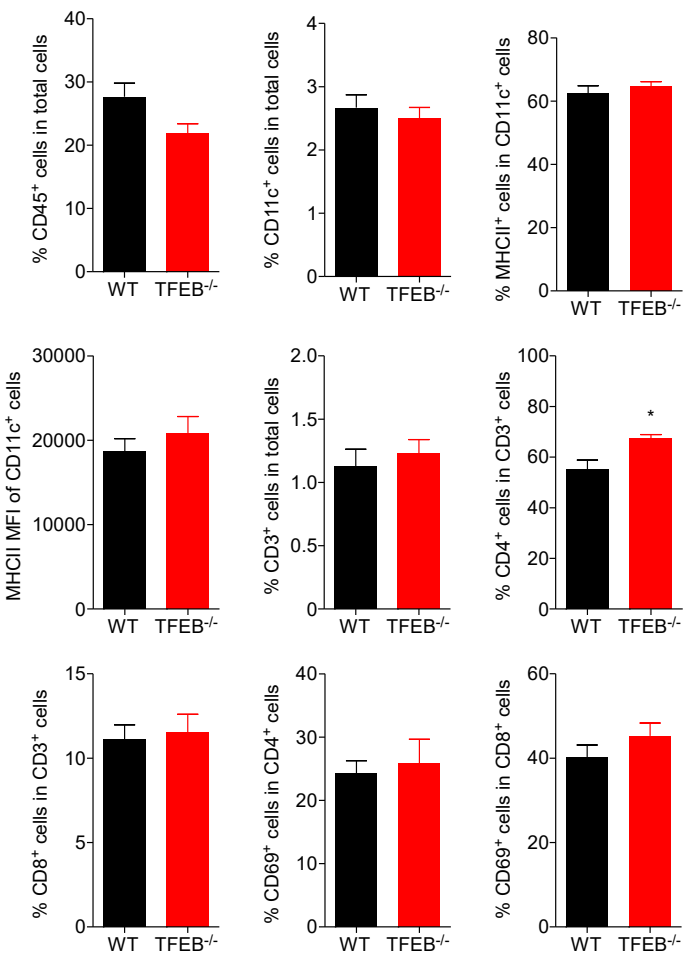

Supplementary Figure S1

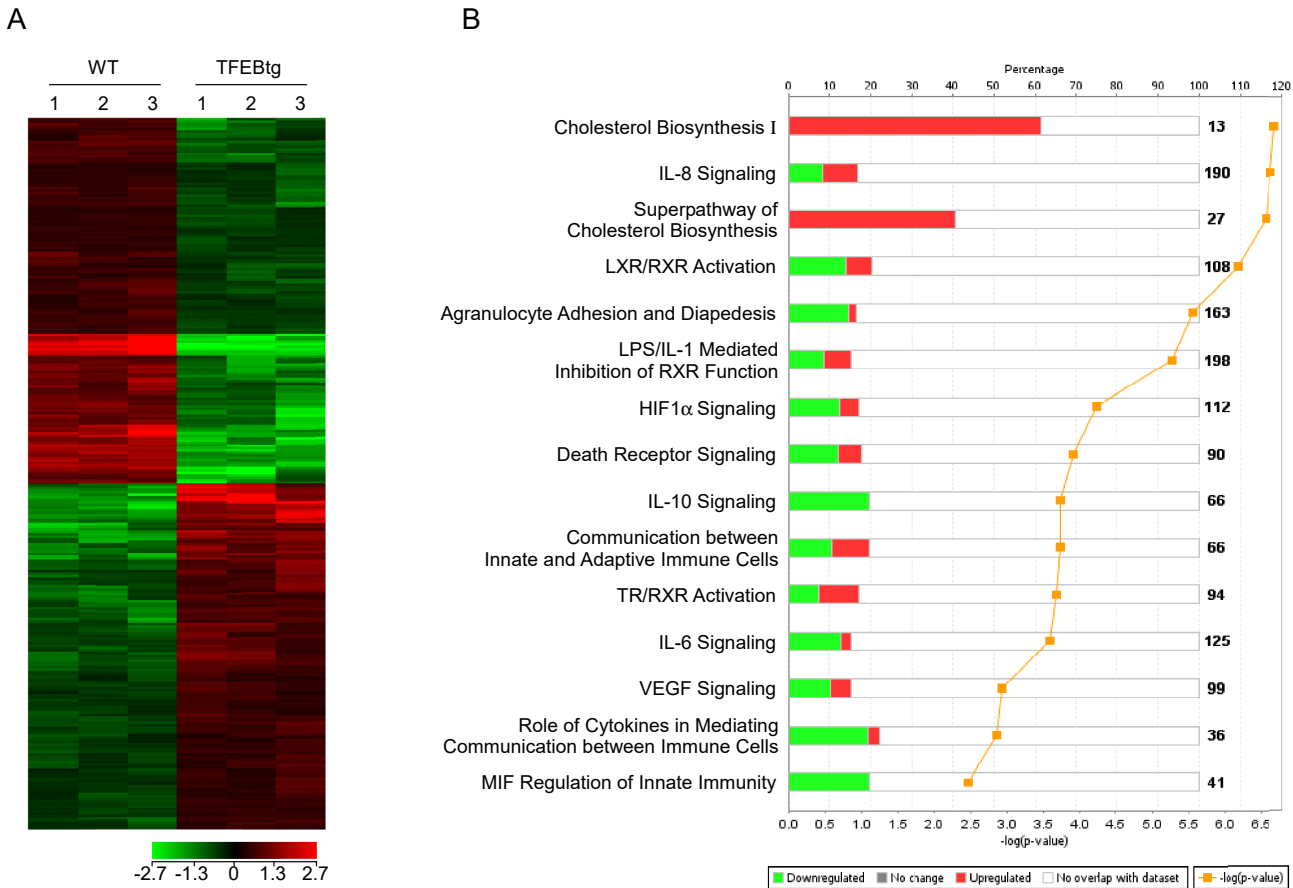

Supplementary Figure S2

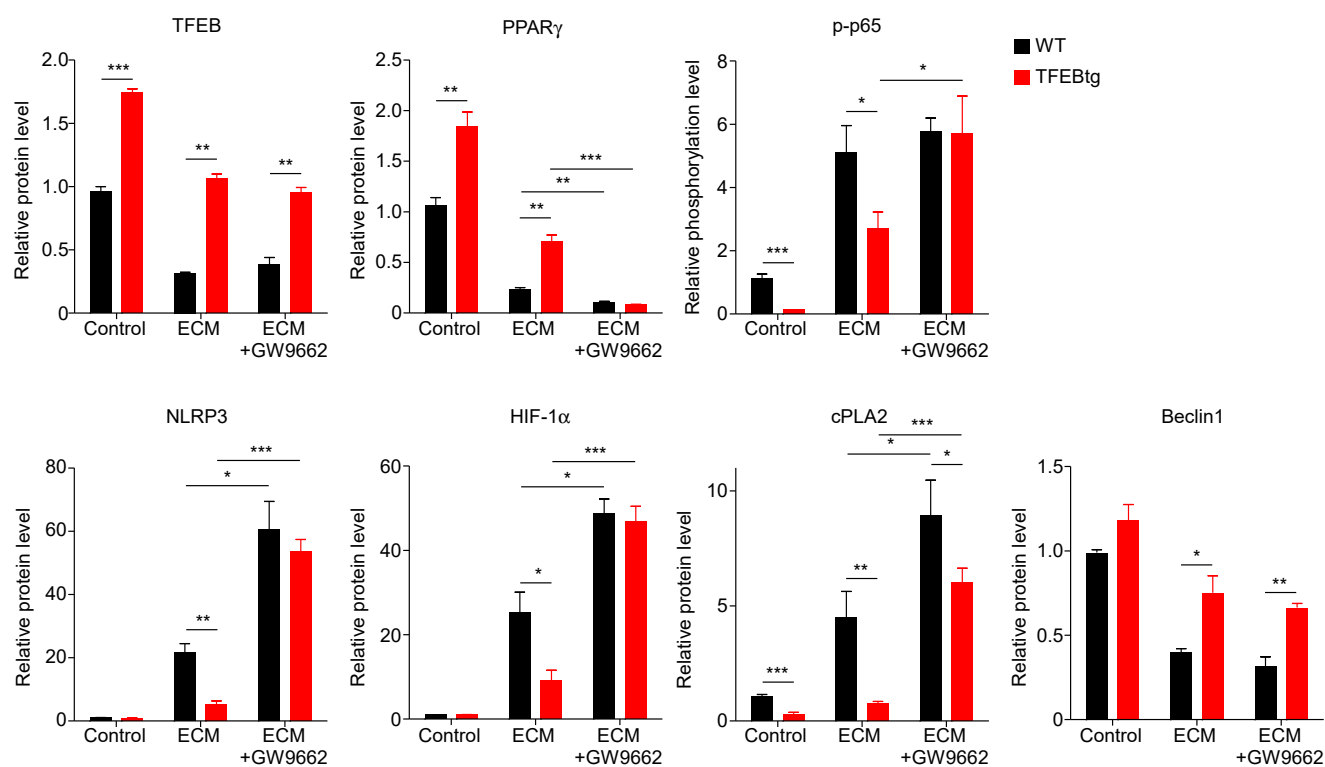

Supplementary Figure S3

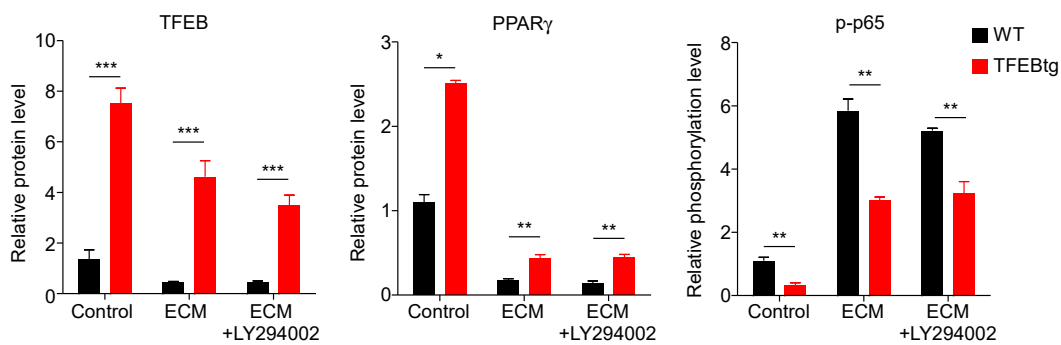

Supplementary Figure S4

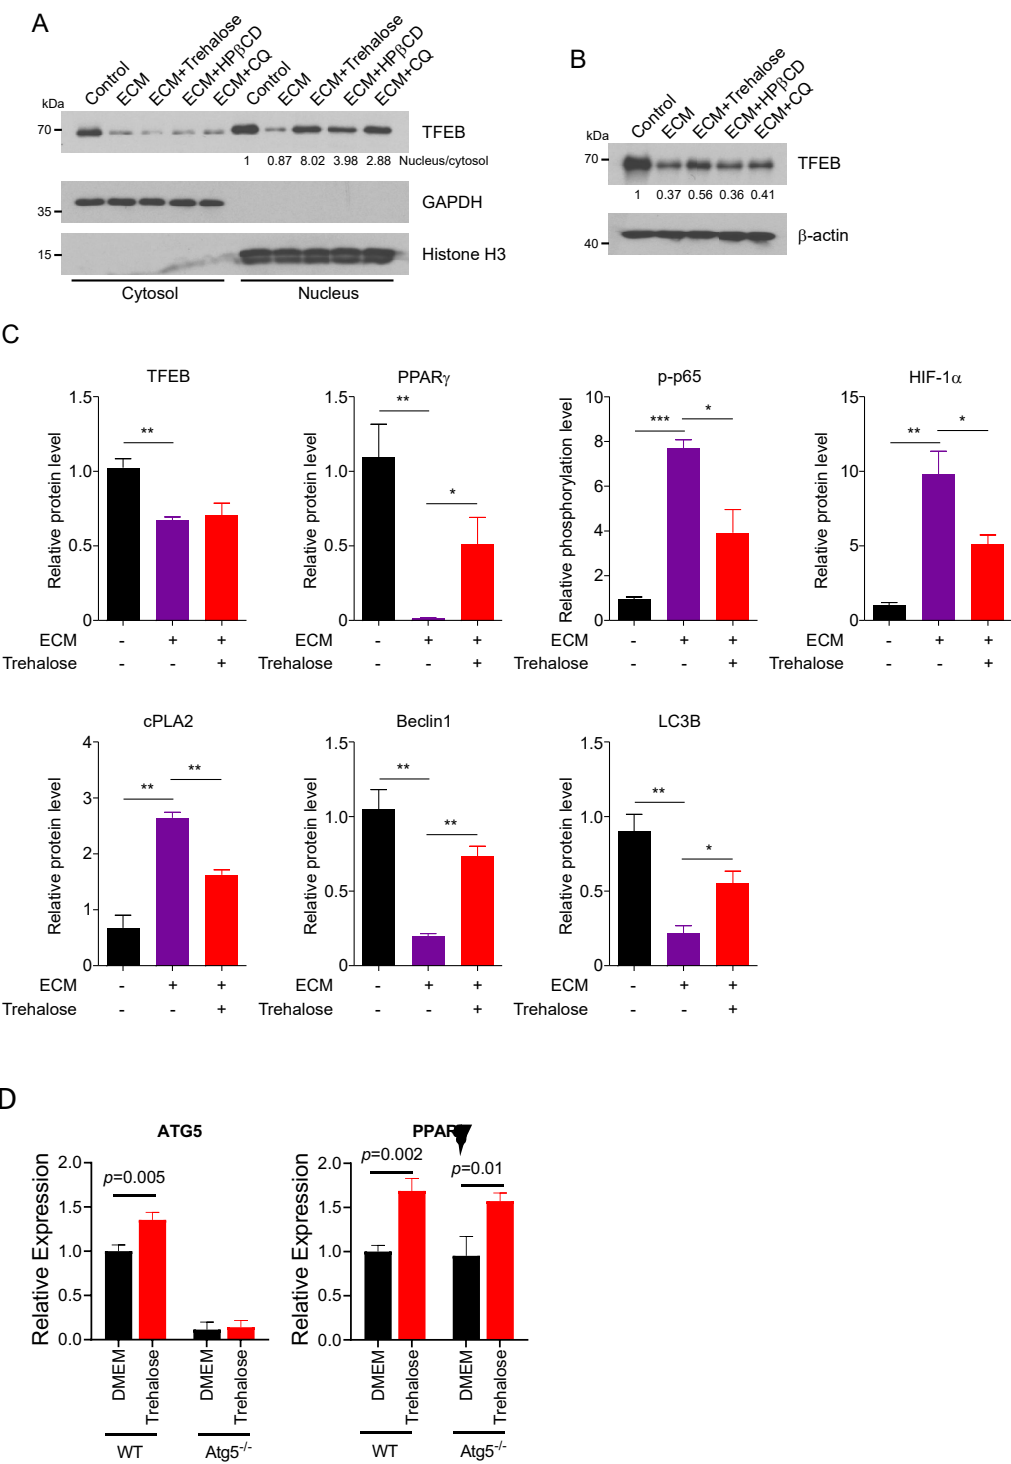

Supplementary Figure S5

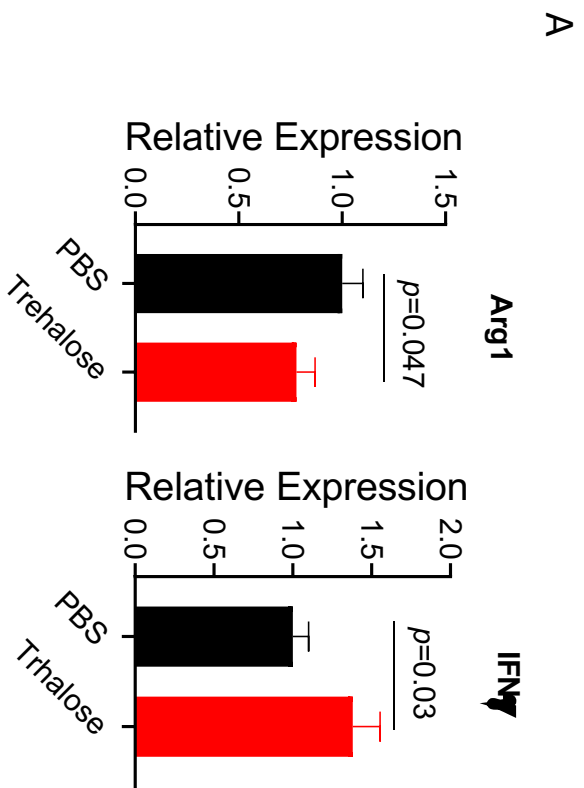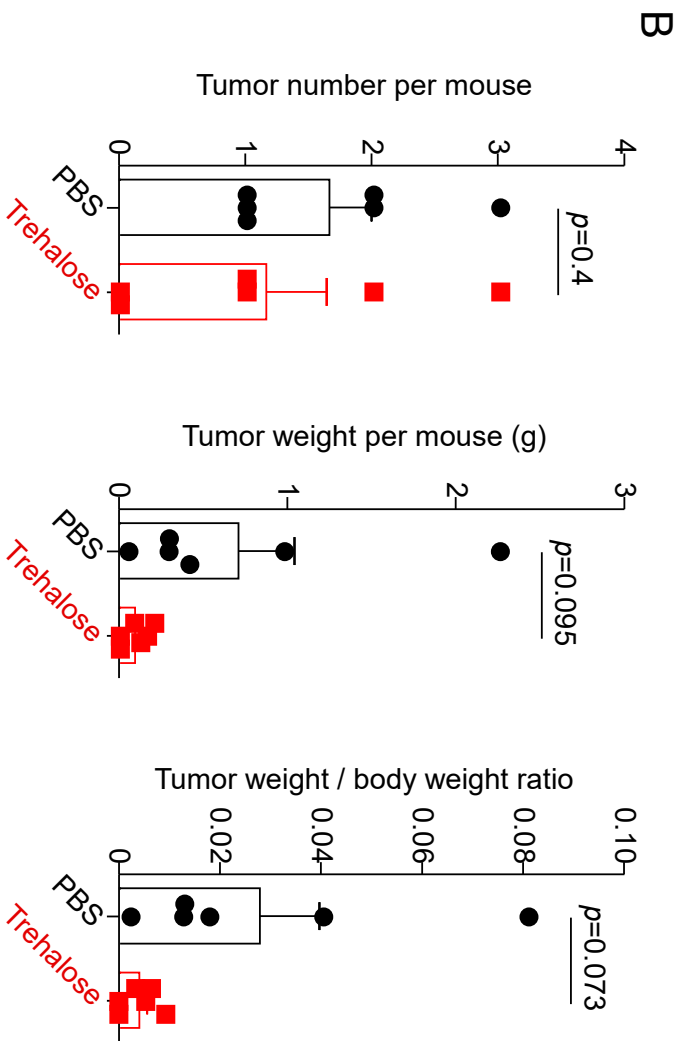

Supplementary Figure S6

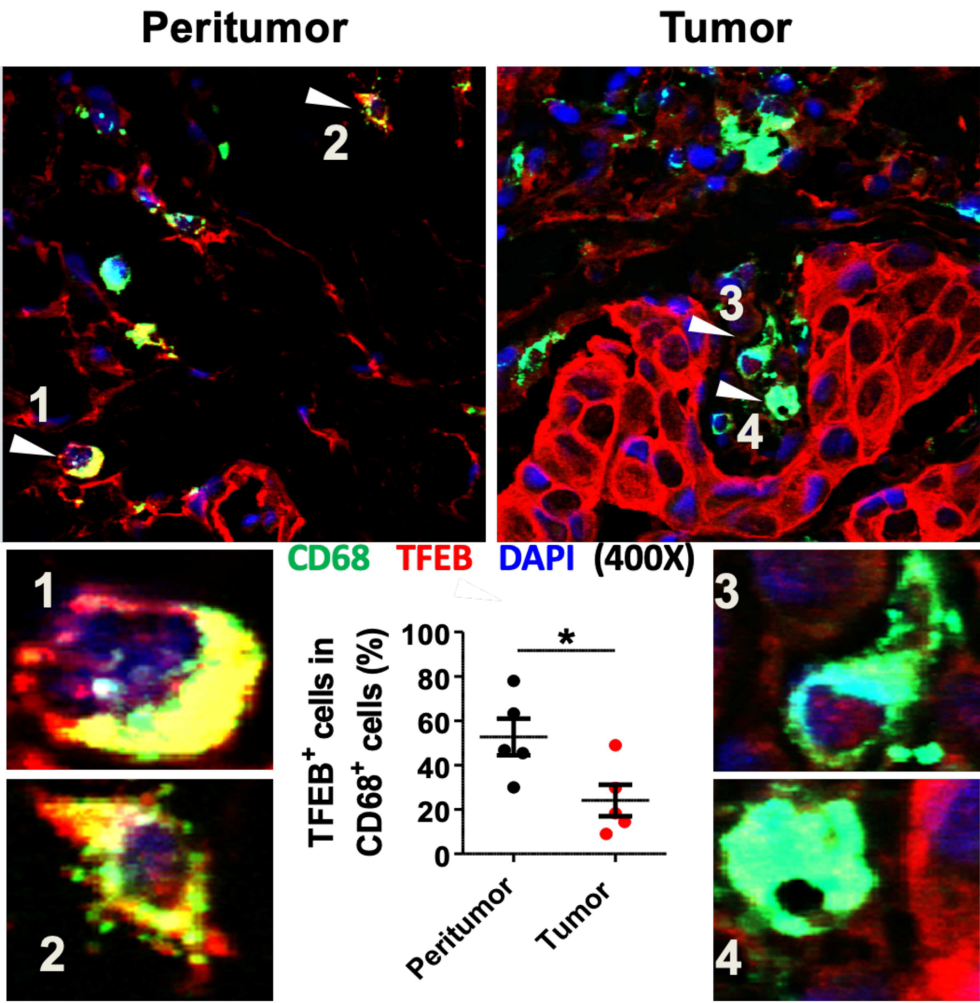

Supplementary Figure S7
